# Supplementary material for: Chaperone-mediated ordered assembly of the SAGA and NuA4 transcription co-activator complexes in yeast
Source: PubMed Central journal article supplement (PMC6868236; doi:10.1038/s41467-019-13243-w), 2019-11-20
Supplement: 41467_2019_13243_MOESM2_ESM.pdf [file 41467_2019_13243_MOESM2_ESM.pdf]

## **Description of Additional Supplementary Files**

File Name: Supplementary Data 1

Description: Summary of proteins identified by tandem affinity purification of Tti2. Shown are results of LC-MS/MS analyses of total protein mixtures from purification eluates. 'Mean FC (Log2)' numbers indicate the Log2 of the ratio [LFQ intensity in Tti2-TAP]/[LFQ intensity in no-TAP controls], averaged from four independent replicates. 'q value' numbers were calculated using a 1% permutation-based false discovery rate (FDR) in a two-tailed Student's t-test.
